# Supplementary material
Source: Springer Nature journal article supplement (https://www.springermedizin.de/resource/supplementary/12876_2013_1041_MOESM2_ESM.pdf/9438482)
Supplement: MOESM2 [file 9438482]

Supplementary table 1:

| TOTAL UC COLECTOMIES                                         | U-STELA                         |                                 | Mean (RNaseP)                   |                                 | Mean (TERT)                     |      |      |
|--------------------------------------------------------------|---------------------------------|---------------------------------|---------------------------------|---------------------------------|---------------------------------|------|------|
|                                                              | Progressors vs. non-progressors |                                 | Progressors vs. non-progressors |                                 | Progressors vs. non-progressors |      |      |
|                                                              | N                               | 51                              | 27                              | 69                              | 22                              | 67   | 22   |
| Mean                                                         | 4.24                            | 3.06                            | 1.26                            | 1.31                            | 1.11                            | 1.29 |      |
| p                                                            | <0.001                          |                                 | 0.56                            |                                 | 0.08                            |      |      |
| Non-dysplastic, diploid progressor lesions vs nonprogressors |                                 |                                 |                                 |                                 |                                 |      |      |
| Progressors vs. non-progressors                              |                                 | Progressors vs. non-progressors |                                 | Progressors vs. non-progressors |                                 |      |      |
| N                                                            | 24                              | 27                              | 25                              | 22                              | 24                              | 22   |      |
| Mean                                                         | 3.96                            | 3.06                            | 1.43                            | 1.31                            | 1.29                            | 1.26 |      |
| p                                                            | <0.001                          |                                 | 0.35                            |                                 | 0.83                            |      |      |
| PROGRESSOR COLECTOMIES                                       | Diploid vs. aneuploid           |                                 | Diploid vs. aneuploid           |                                 | Diploid vs. aneuploid           |      |      |
|                                                              | N                               | 39                              | 12                              | 49                              | 20                              | 47   | 20   |
|                                                              | Mean                            | 4.19                            | 4.39                            | 1.29                            | 1.18                            | 1.13 | 0.93 |
|                                                              | p                               | 0.46                            |                                 | 0.27                            |                                 | 0.04 |      |
|                                                              | Non-dysplasia vs. Dysplasia*    |                                 | Non-dysplasia vs. dysplasia*    |                                 | Non-dysplasia vs. Dysplasia*    |      |      |
|                                                              | N                               | 28                              | 23                              | 32                              | 37                              | 31   | 36   |
|                                                              | Mean                            | 3.97                            | 4.57                            | 1.41                            | 1.11                            | 1.22 | 0.93 |
| p                                                            | 0.007                           |                                 | <0.001                          |                                 | <0.001                          |      |      |
| Only diploid lesions                                         |                                 |                                 |                                 |                                 |                                 |      |      |
| Non-dysplasia vs. Dysplasia*                                 |                                 | Non-dysplasia vs. Dysplasia*    |                                 | Non-dysplasia vs. Dysplasia*    |                                 |      |      |
| N                                                            | 24                              | 15                              | 25                              | 24                              | 24                              | 23   |      |
| Mean                                                         | 3.96                            | 4.57                            | 1.43                            | 1.14                            | 1.26                            | 0.99 |      |
| p                                                            | 0.03                            |                                 | 0.007                           |                                 | 0.008                           |      |      |

\*dysplasia includes indefinite for dysplasia, LGD, HGD and adecocarcinoma
